# Supplementary material
Source: Springer Nature journal article supplement (https://www.springermedizin.de/resource/supplementary/12985_2010_1025_MOESM3_ESM.pdf/9608974)

**a****Pusa Ruby  
Healthy****Pusa Ruby  
ToLCNDV (2A+2B)  
agroinfected****LA1777****Leaves**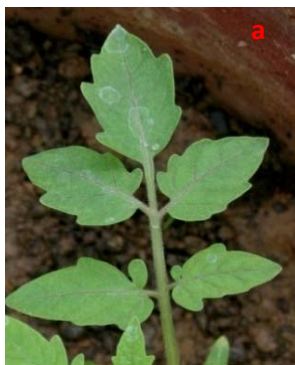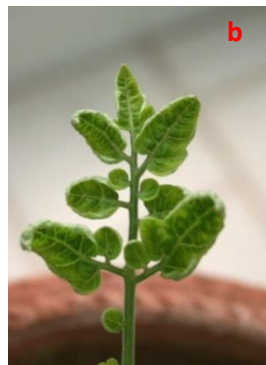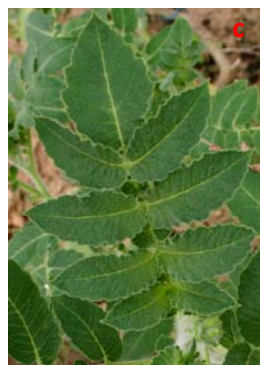**Flowers**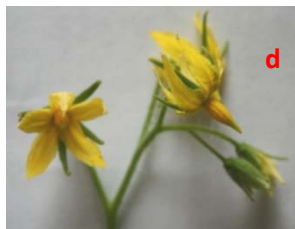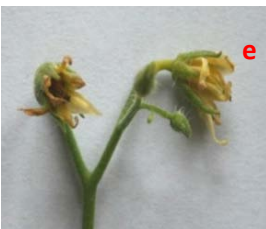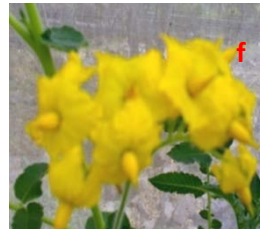**b****1****2****3****4****5****6****Coat protein** →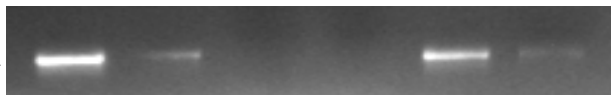**Actin** →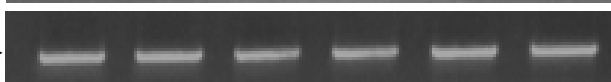

Supplement: MOESM3 [file 9608974]
